# Supplementary material for: Practical impacts of genomic data “cleaning” on biological discovery using surrogate variable analysis
Source: PubMed Central journal article supplement (PMC4636836; doi:10.1186/s12859-015-0808-5), 2015-11-06

# Mesendodermal

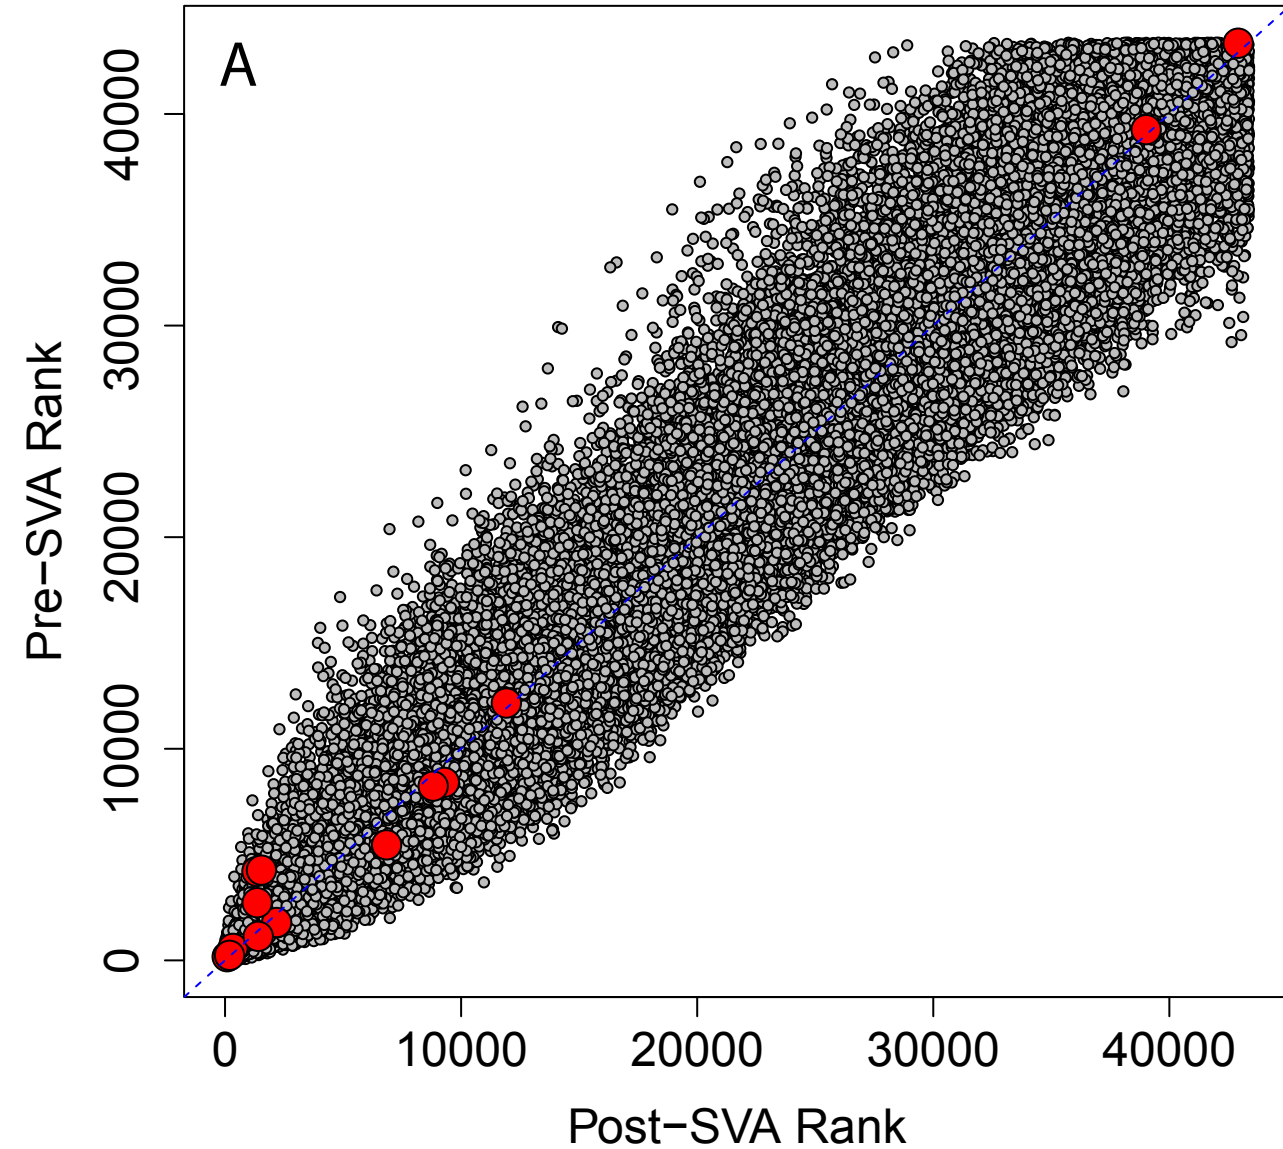

# Neuroectodermal

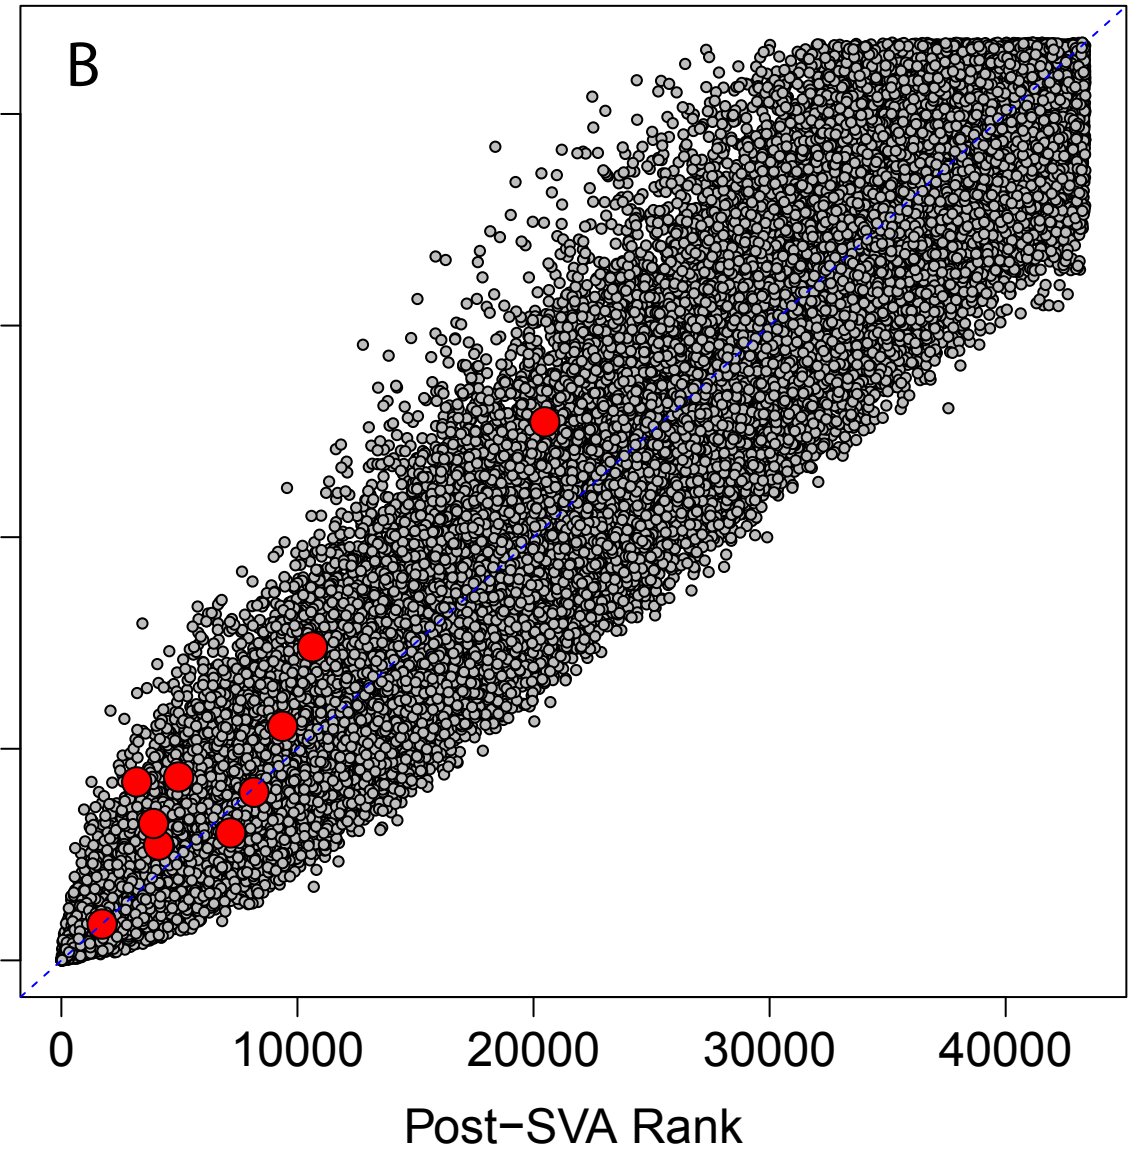

Supplement: 12859_2015_808_MOESM3_ESM.pdf [file 12859_2015_808_MOESM3_ESM.pdf]
