# Supplementary material for: Practical impacts of genomic data “cleaning” on biological discovery using surrogate variable analysis
Source: PubMed Central journal article supplement (PMC4636836; doi:10.1186/s12859-015-0808-5), 2015-11-06

# With ComBat, Treatment Model

PC2: 14.3 % of Variance Explained

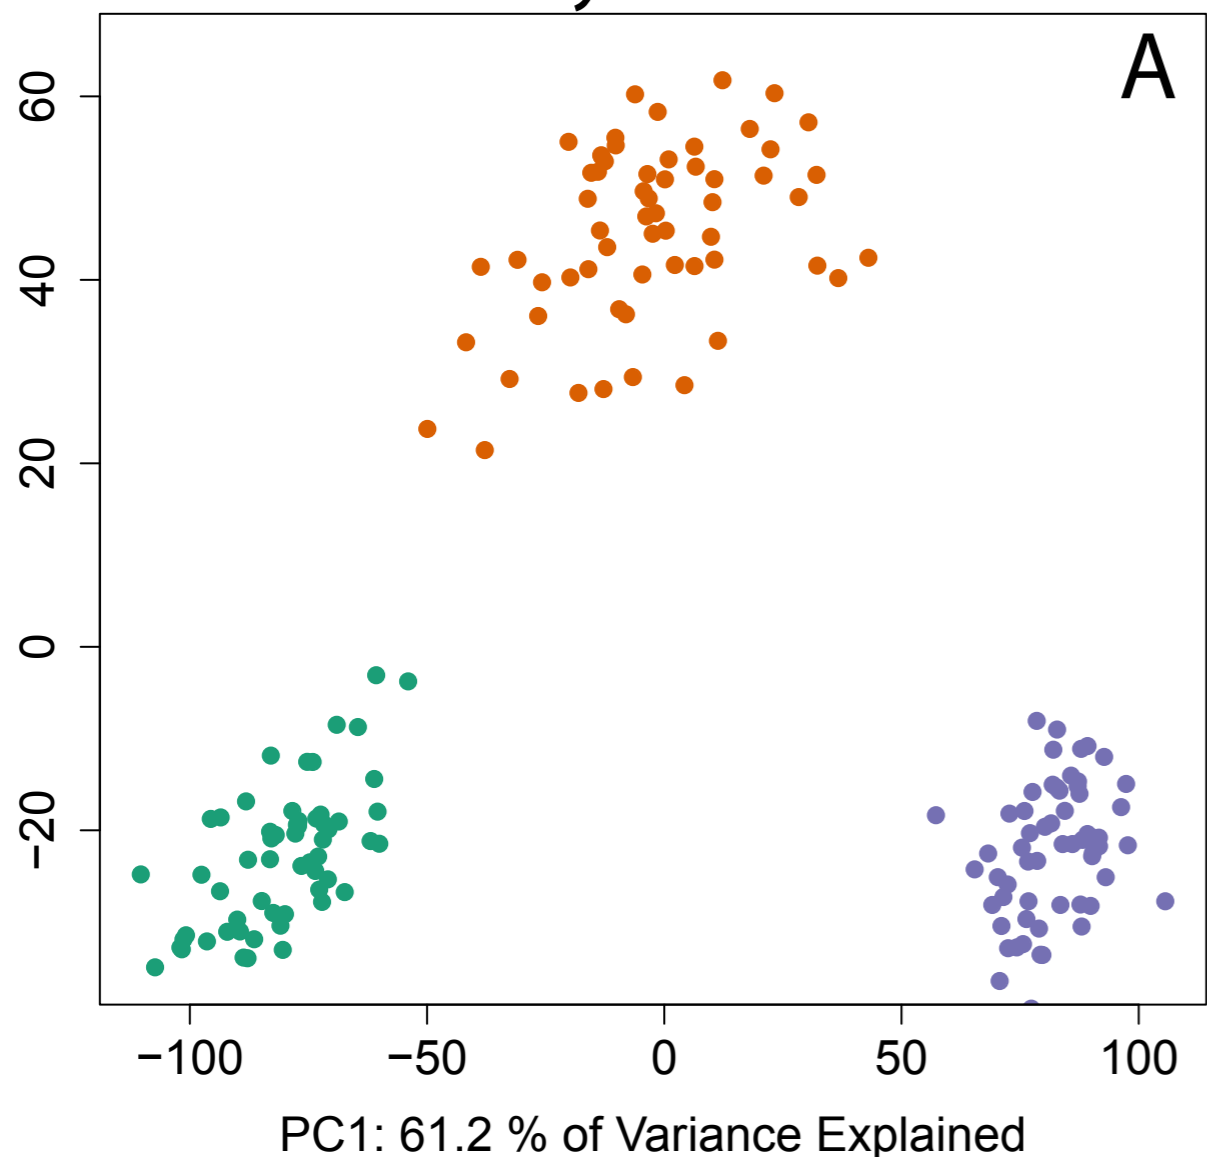

# Colored by Batch

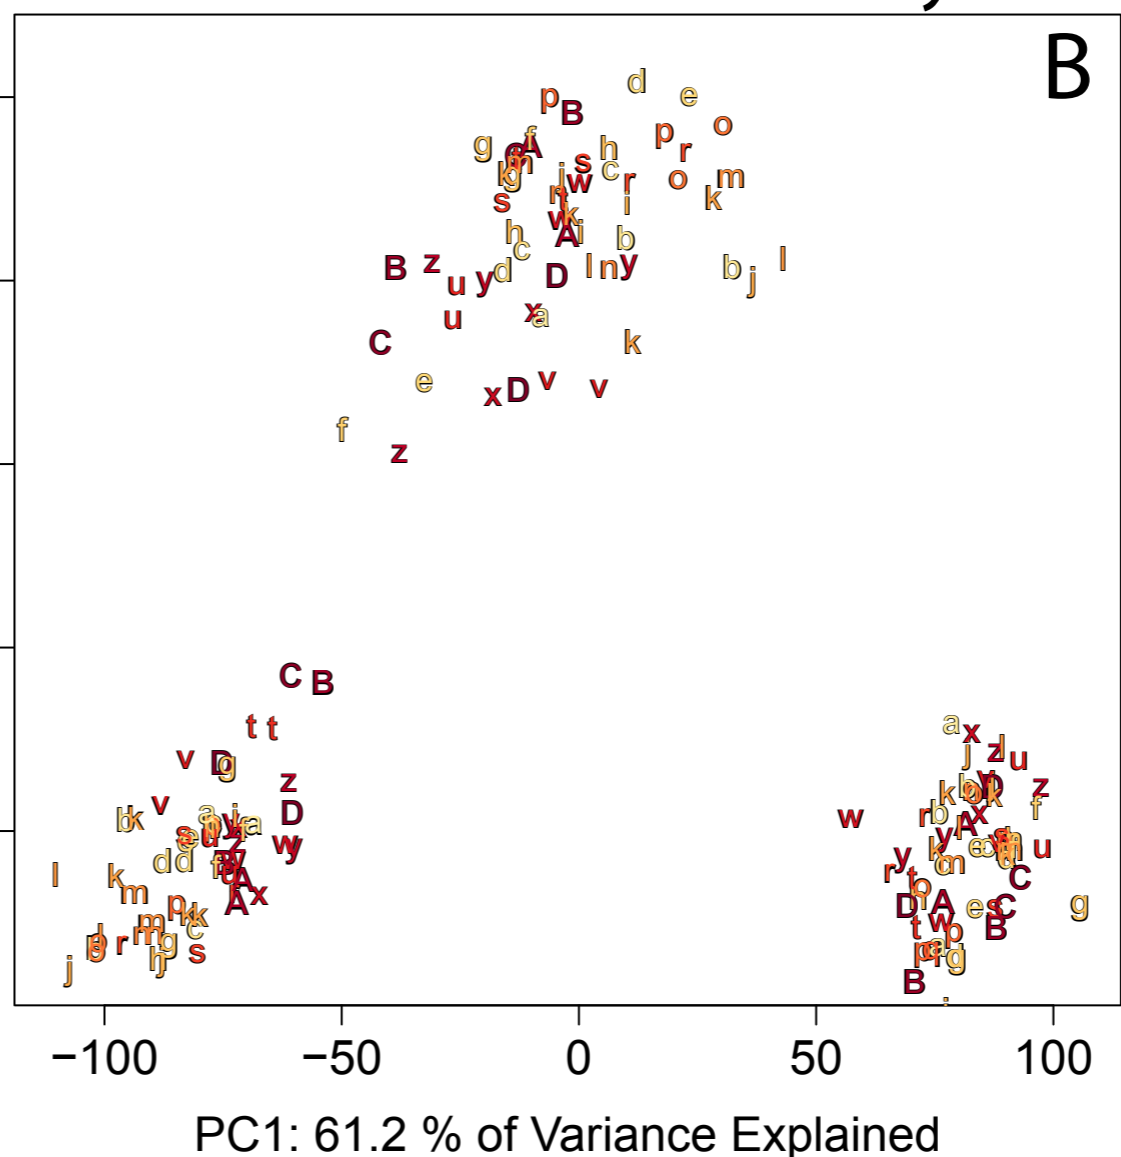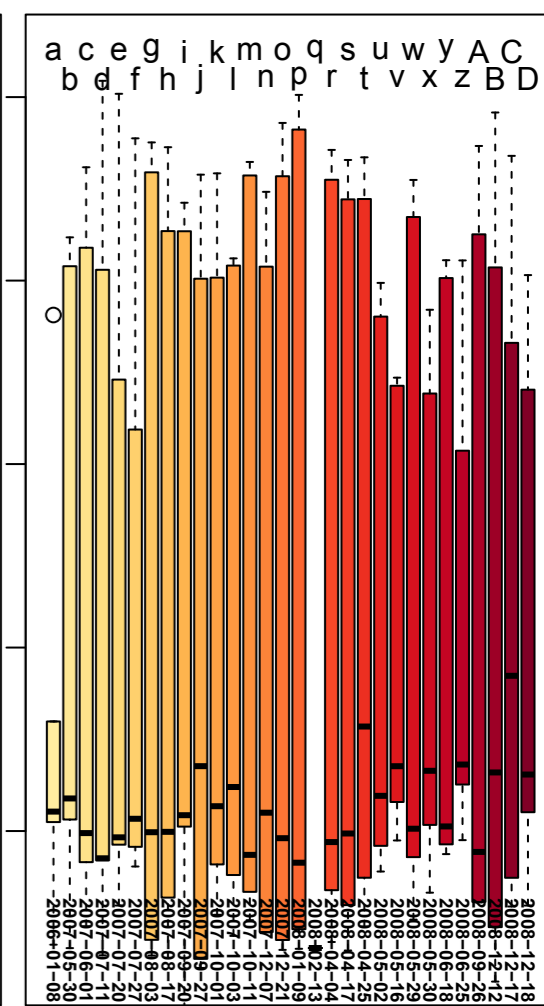

# With ComBat, No Model

PC2: 13.7 % of Variance Explained

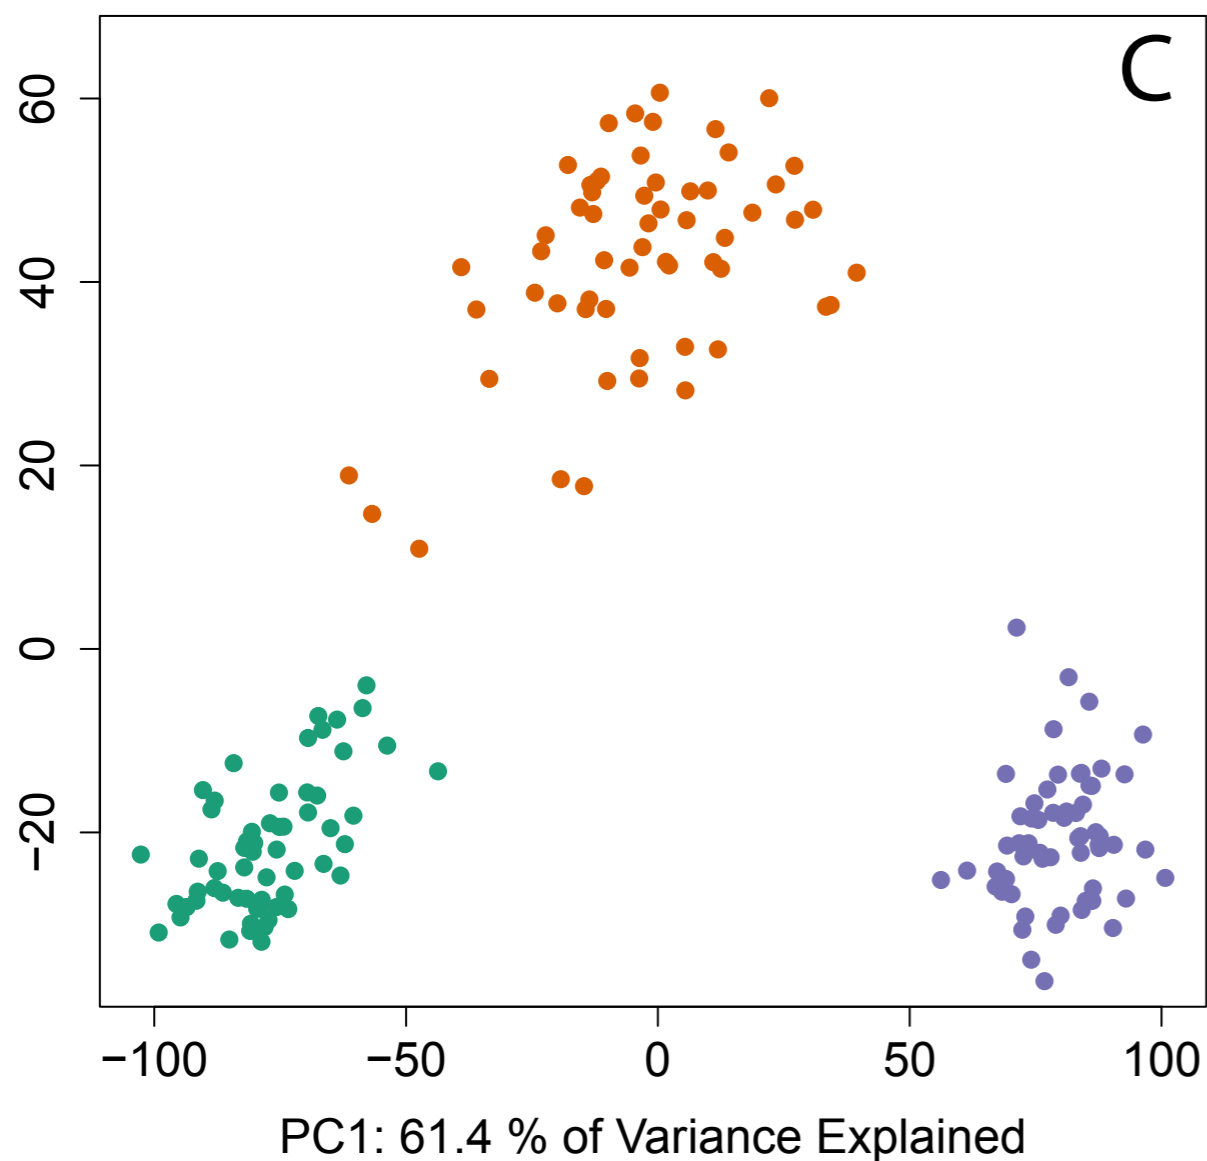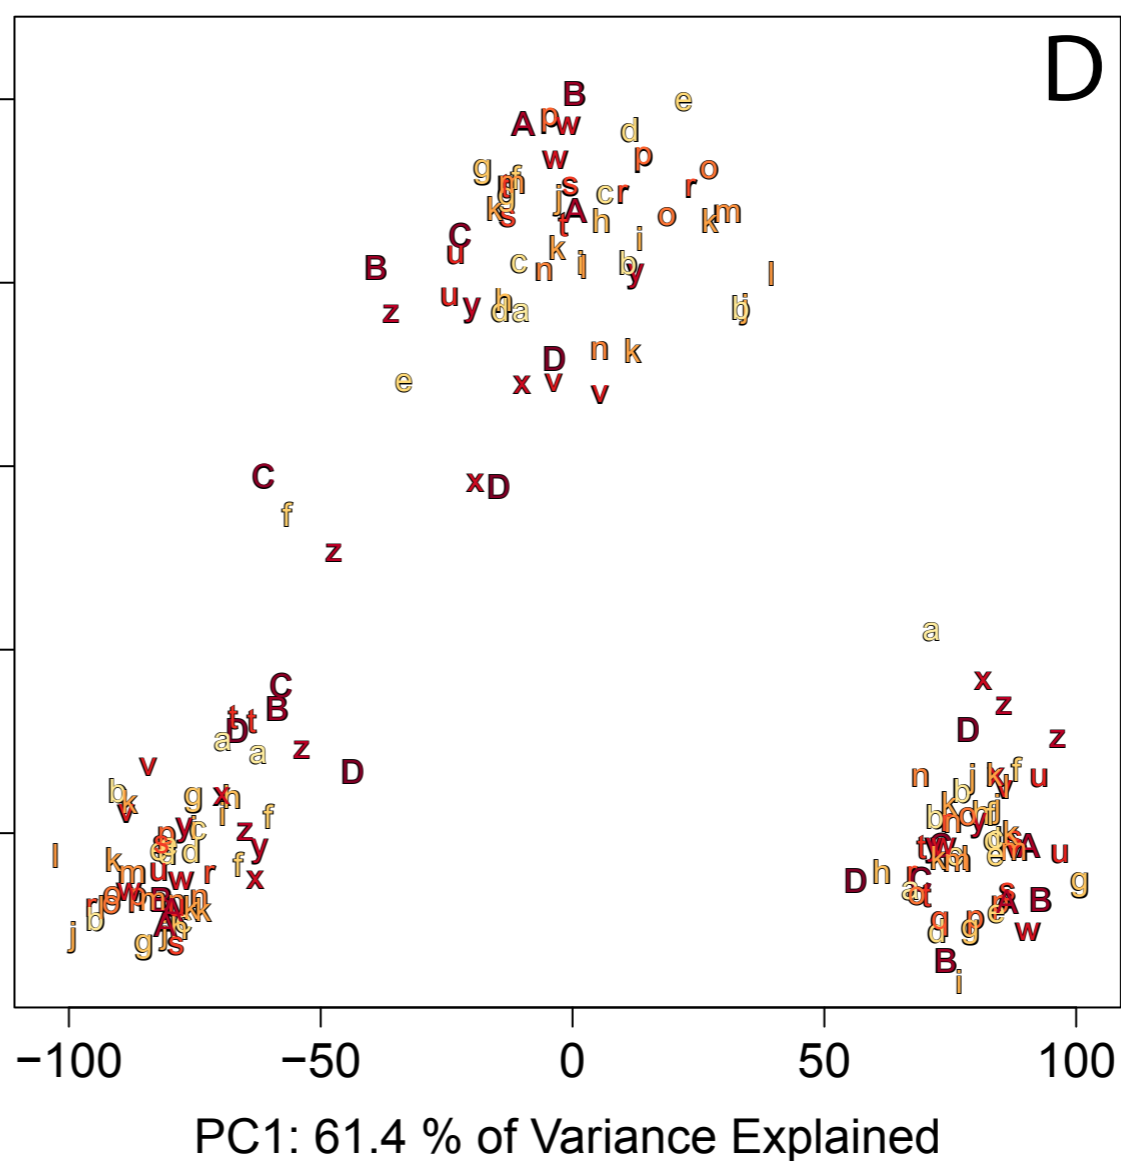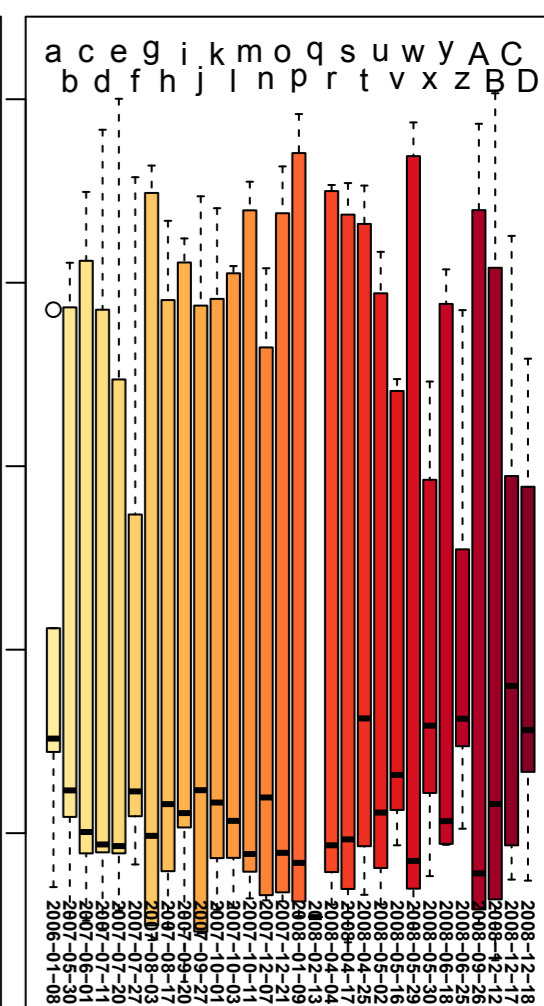

Supplement: 12859_2015_808_MOESM4_ESM.pdf [file 12859_2015_808_MOESM4_ESM.pdf]
